# Supplementary material for: Diatom Milking: A Review and New Approaches
Source: PubMed Central journal article supplement (PMC4446598; doi:10.3390/md13052629), 2015-04-29
Supplement: marinedrugs-13-02629-s001.pdf [file marinedrugs-13-02629-s001.pdf]

## Supplementary Information

**Table S1.** Diatom taxa reported per site with samples from 10 different locations in Georgia. To indicate species richness, unique taxa across all samples are also presented, repeated taxa between locations are not numbered, but presented in alphabetical order within a site. Taxa followed by a number require additional taxonomic evaluation and consideration as new to science. Numbers were carried across sites. The abbreviation spp. indicates a taxon seen in girdle view and without enough evidence for species separation. See Table 3 for identification of sites.

| Unique Taxon Number | Taxon                                                                   | Site |
|---------------------|-------------------------------------------------------------------------|------|
| 1                   | <i>Achnantheidium affine</i> (Grunow) Czarnecki                         | 8    |
| 2                   | <i>Achnantheidium deflexum</i> (Reimer) Kingston                        | 1    |
|                     | <i>Achnantheidium deflexum</i> (Reimer) Kingston                        | 6    |
| 3                   | <i>Achnantheidium exiguum</i> (Grunow) Czarnecki                        | 1    |
|                     | <i>Achnantheidium exiguum</i> (Grunow) Czarnecki                        | 2    |
|                     | <i>Achnantheidium exiguum</i> (Grunow) Czarnecki                        | 5    |
|                     | <i>Achnantheidium exiguum</i> (Grunow) Czarnecki                        | 8    |
| 4                   | <i>Achnantheidium minutissimum</i> (Kützing) Czarnecki                  | 1    |
|                     | <i>Achnantheidium minutissimum</i> (Kützing) Czarnecki                  | 5    |
|                     | <i>Achnantheidium minutissimum</i> (Kützing) Czarnecki                  | 6    |
|                     | <i>Achnantheidium minutissimum</i> (Kützing) Czarnecki                  | 7    |
|                     | <i>Achnantheidium minutissimum</i> (Kützing) Czarnecki                  | 8    |
|                     | <i>Achnantheidium minutissimum</i> (Kützing) Czarnecki                  | 9    |
| 5                   | <i>Achnantheidium saprophilum</i> (Kobayashi et Mayama) Round et Bukht. | 5    |
| 6                   | <i>Achnantheidium</i> sp. 1                                             | 5    |
| 7                   | <i>Achnantheidium</i> sp. 2                                             | 6    |
| 8                   | <i>Achnantheidium</i> sp. 3                                             | 2    |
| 9                   | <i>Achnantheidium</i> sp. 4                                             | 8    |
| 10                  | <i>Achnantheidium</i> sp. 5                                             | 7    |
| 11                  | <i>Achnantheidium</i> sp. 6                                             | 10   |
| 12                  | <i>Amphora copulata</i> (Kützing) Schoeman et Archibald                 | 5    |
|                     | <i>Amphora copulata</i> (Kützing) Schoeman et Archibald                 | 7    |
|                     | <i>Amphora copulata</i> (Kützing) Schoeman et Archibald                 | 8    |
|                     | <i>Amphora copulata</i> (Kützing) Schoeman et Archibald                 | 9    |
| 13                  | <i>Amphora pediculus</i> (Kützing) Grunow                               | 9    |
| 14                  | <i>Amphora</i> sp. 1                                                    | 10   |
| 15                  | <i>Amphora</i> spp.                                                     | 10   |
| 16                  | <i>Amphora veneta</i> Kützing                                           | 9    |
| 17                  | <i>Aulacoseira ambigua</i> (Grunow) Simonsen                            | 5    |
|                     | <i>Aulacoseira ambigua</i> (Grunow) Simonsen                            | 7    |
|                     | <i>Aulacoseira ambigua</i> (Grunow) Simonsen                            | 8    |
|                     | <i>Aulacoseira ambigua</i> (Grunow) Simonsen                            | 9    |
| 18                  | <i>Aulacoseira granulata</i> var. <i>angustissima</i> (Müller) Simonsen | 9    |
|                     | <i>Aulacoseira granulata</i> var. <i>angustissima</i> (Müller) Simonsen | 8    |
| 18                  | <i>Aulacoseira italica</i> (Ehrenberg) Simonsen                         | 7    |
| 20                  | <i>Aulacoseira</i> sp. 1                                                | 2    |

Table S1. Cont.

|    |                                                                                 |    |
|----|---------------------------------------------------------------------------------|----|
| 21 | <i>Aulacoseira</i> sp. 2                                                        | 8  |
| 22 | <i>Aulacoseira</i> sp. 3                                                        | 7  |
| 23 | <i>Aulacoseira</i> sp. 4                                                        | 10 |
| 24 | <i>Aulacoseira</i> spp.                                                         | 6  |
| 25 | <i>Bacillaria paradoxa</i> Gmelin                                               | 2  |
|    | <i>Bacillaria paradoxa</i> Gmelin                                               | 7  |
| 26 | <i>Biddulphia</i> sp. 1                                                         | 10 |
| 27 | <i>Biddulphia</i> sp. 2                                                         | 10 |
| 28 | <i>Biremis circumtexta</i> (Meister ex Hustedt) Lange-Bertalot et Witk.         | 10 |
| 29 | <i>Caloneis bacillum</i> (Grunow) Cleve                                         | 5  |
|    | <i>Caloneis bacillum</i> (Grunow) Cleve                                         | 7  |
|    | <i>Caloneis bacillum</i> (Grunow) Cleve                                         | 8  |
| 30 | <i>Caloneis</i> sp. 1                                                           | 2  |
| 31 | <i>Campylosira cymbelliformis</i> (Schmidt) Grunow in Van Heurck                | 10 |
| 32 | <i>Cocconeis disculus</i> (Schumann) Cleve                                      | 10 |
| 33 | <i>Cocconeis neodiminuta</i> Krammer                                            | 10 |
| 34 | <i>Cocconeis pediculus</i> Ehrenberg                                            | 9  |
| 35 | <i>Cocconeis placentula</i> Ehrenberg                                           | 4  |
|    | <i>Cocconeis placentula</i> Ehrenberg                                           | 10 |
| 36 | <i>Cocconeis placentula</i> var. <i>euglypta</i> (Ehrenberg) Grunow             | 4  |
| 37 | <i>Cocconeis placentula</i> var. <i>lineata</i> (Ehrenberg) Van Heurck          | 6  |
| 38 | <i>Coscinodiscus</i> sp. 1                                                      | 10 |
| 39 | <i>Craticula ambigua</i> (Ehrenberg) Mann in Round, Crawford and Mann           | 5  |
|    | <i>Craticula ambigua</i> (Ehrenberg) Mann in Round, Crawford and Mann           | 6  |
| 40 | <i>Craticula cuspidata</i> (Kützing) Mann                                       | 5  |
|    | <i>Craticula cuspidata</i> (Kützing) Mann                                       | 9  |
| 41 | <i>Craticula halophila</i> (Grunow ex Van Heurck) Mann                          | 6  |
|    | <i>Craticula halophila</i> (Grunow ex Van Heurck) Mann                          | 10 |
| 42 | <i>Craticula molestiformis</i> (Hustedt) Mayama                                 | 5  |
|    | <i>Craticula molestiformis</i> (Hustedt) Mayama                                 | 8  |
| 43 | <i>Cyclostephanos invisitatus</i> (Hohn et Hellerman) Theriot, Stoermer et Håk. | 6  |
|    | <i>Cyclostephanos invisitatus</i> (Hohn et Hellerman) Theriot, Stoermer et Håk. | 1  |
| 44 | <i>Cyclotella atomus</i> Hustedt                                                | 8  |
|    | <i>Cyclotella atomus</i> Hustedt                                                | 2  |
|    | <i>Cyclotella atomus</i> Hustedt                                                | 10 |
| 45 | <i>Cyclotella litoralis</i> Lange & Syvertsen                                   | 10 |
| 46 | <i>Cyclotella meneghiniana</i> Kützing                                          | 6  |
|    | <i>Cyclotella meneghiniana</i> Kützing                                          | 1  |
| 47 | <i>Cyclotella</i> sp. 2                                                         | 10 |
| 48 | <i>Cylindrotheca gracilis</i> (Brébisson) Grunow                                | 10 |
| 49 | <i>Cymatopleura solea</i> var. <i>apiculata</i> (Smith) Ralfs                   | 2  |
| 50 | <i>Cymatosira belgica</i> Grunow                                                | 10 |
| 51 | <i>Cymatosira Lorenziana</i> Grunow                                             | 10 |
| 52 | <i>Delphineis surirella</i> (Ehrenberg) Andrews                                 | 10 |
| 53 | <i>Denticula kuetzingii</i> Grunow                                              | 6  |

Table S1. Cont.

|    |                                                                             |    |
|----|-----------------------------------------------------------------------------|----|
| 54 | <i>Diadasmus confervacea</i> Kützing                                        | 1  |
|    | <i>Diadasmus confervacea</i> Kützing                                        | 5  |
| 55 | <i>Diadasmus contenta</i> (Grunow ex Van Heurck) Mann                       | 5  |
|    | <i>Diadasmus contenta</i> (Grunow ex Van Heurck) Mann                       | 8  |
| 56 | <i>Diploneis aestuari</i> Hustedt                                           | 10 |
| 57 | <i>Diploneis pseudobombiformis</i> Hustedt                                  | 10 |
| 58 | <i>Discostella pseudostelligera</i> (Hustedt) Houk et Klee                  | 10 |
| 59 | <i>Discostella stelligera</i> (Cleve et Grunow in Cleve) Houk et Klee       | 2  |
|    | <i>Discostella stelligera</i> (Cleve et Grunow in Cleve) Houk et Klee       | 5  |
|    | <i>Discostella stelligera</i> (Cleve et Grunow in Cleve) Houk et Klee       | 6  |
|    | <i>Discostella stelligera</i> (Cleve et Grunow in Cleve) Houk et Klee       | 8  |
| 60 | <i>Encyonema silesiacum</i> (Bleisch) Mann                                  | 8  |
| 61 | <i>Encyonema triangulum</i> (Ehrenberg) Kützing                             | 6  |
| 62 | <i>Entomoneis alata</i> (Ehrenberg) Ehrenberg                               | 6  |
|    | <i>Entomoneis alata</i> (Ehrenberg) Ehrenberg                               | 10 |
| 63 | <i>Eolimna minima</i> (Grunow) Lange-Bertalot                               | 1  |
|    | <i>Eolimna minima</i> (Grunow) Lange-Bertalot                               | 5  |
|    | <i>Eolimna minima</i> (Grunow) Lange-Bertalot                               | 7  |
|    | <i>Eolimna minima</i> (Grunow) Lange-Bertalot                               | 9  |
| 64 | <i>Eolimna tantula</i> (Hustedt) Lange-Bertalot in Werum and Lange-Bertalot | 5  |
| 65 | <i>Epithemia adnata</i> (Kützing) Brébisson                                 | 5  |
| 66 | <i>Epithemia turgida</i> (Ehrenberg) Kützing                                | 1  |
| 67 | <i>Eunotia bilunaris</i> (Ehrenberg) Mills                                  | 5  |
|    | <i>Eunotia bilunaris</i> (Ehrenberg) Mills                                  | 7  |
|    | <i>Eunotia bilunaris</i> (Ehrenberg) Souza                                  | 2  |
| 68 | <i>Eunotia meisteri</i> Hustedt                                             | 8  |
| 69 | <i>Eunotia pectinalis</i> (Müller) Rabenhorst                               | 2  |
|    | <i>Eunotia pectinalis</i> (Müller) Rabenhorst                               | 5  |
|    | <i>Eunotia pectinalis</i> (Müller) Rabenhorst                               | 6  |
|    | <i>Eunotia pectinalis</i> (Müller) Rabenhorst                               | 7  |
| 70 | <i>Eunotia pectinalis</i> var. <i>undulata</i> (Ralfs) Rabenhorst           | 8  |
| 71 | <i>Eunotia soleirolii</i> (Kützing) Rabenhorst                              | 5  |
|    | <i>Eunotia soleirolii</i> (Kützing) Rabenhorst                              | 8  |
| 72 | <i>Eunotia</i> sp. 1                                                        | 5  |
|    | <i>Eunotia</i> sp. 1                                                        | 8  |
| 73 | <i>Eunotia</i> sp. 2                                                        | 5  |
|    | <i>Eunotia</i> sp. 2                                                        | 8  |
| 74 | <i>Eunotia</i> sp. 3                                                        | 6  |
| 75 | <i>Eunotia</i> sp. 4                                                        | 1  |
| 76 | <i>Eunotia</i> sp. 5                                                        | 8  |
| 77 | <i>Eunotia</i> sp. 6                                                        | 5  |
| 78 | <i>Fragilaria capucina</i> Desmazières                                      | 7  |
|    | <i>Fragilaria capucina</i> Desmazières                                      | 5  |
| 79 | <i>Fragilaria gracilis</i> Østrup                                           | 5  |
| 80 | <i>Fragilaria mesolepta</i> Rabenhorst                                      | 6  |
| 81 | <i>Fragilaria parasitica</i> (Smith) Grunow in Van Heurck                   | 5  |

Table S1. Cont.

|     |                                                                      |    |
|-----|----------------------------------------------------------------------|----|
| 82  | <i>Fragilaria sepes</i> Ehrenberg                                    | 8  |
| 83  | <i>Fragilaria</i> sp. 1                                              | 8  |
| 84  | <i>Fragilaria tenera</i> (Smith) Lange-Bertalot                      | 7  |
| 85  | <i>Frustulia crassinervia</i> (Br ébisson) Lange-Bertalot et Krammer | 8  |
|     | <i>Frustulia crassinervia</i> (Br ébisson) Lange-Bertalot et Krammer | 7  |
| 86  | <i>Frustulia vulgaris</i> (Thwaites) De Toni                         | 8  |
|     | <i>Frustulia vulgaris</i> (Thwaites) De Toni                         | 5  |
| 87  | <i>Gomphonema acidoclinatum</i> Lange-Bertalot et Reichardt          | 5  |
| 88  | <i>Gomphonema affine</i> K ütz ing                                   | 6  |
|     | <i>Gomphonema affine</i> K ütz ing                                   | 2  |
| 89  | <i>Gomphonema angustum</i> Agardh                                    | 7  |
| 90  | <i>Gomphonema gracile</i> Ehrenberg                                  | 6  |
|     | <i>Gomphonema gracile</i> Ehrenberg                                  | 2  |
|     | <i>Gomphonema gracile</i> Ehrenberg                                  | 5  |
| 91  | <i>Gomphonema hebridense</i> Gregory                                 | 5  |
| 92  | <i>Gomphonema innocens</i> Reichardt                                 | 5  |
| 93  | <i>Gomphonema lippertii</i> E.Reichardt et Lange-Bertalot            | 7  |
|     | <i>Gomphonema lippertii</i> E.Reichardt et Lange-Bertalot            | 5  |
| 94  | <i>Gomphonema minutum</i> (Agardh) Agardh                            | 1  |
| 95  | <i>Gomphonema olivaceoides</i> Hustedt                               | 6  |
| 96  | <i>Gomphonema parvulum</i> (K ütz ing) K ütz ing                     | 1  |
|     | <i>Gomphonema parvulum</i> (K ütz ing) K ütz ing                     | 5  |
|     | <i>Gomphonema parvulum</i> (K ütz ing) K ütz ing                     | 6  |
|     | <i>Gomphonema parvulum</i> (K ütz ing) K ütz ing                     | 7  |
|     | <i>Gomphonema parvulum</i> (K ütz ing) K ütz ing                     | 8  |
| 97  | <i>Gomphonema pseudoboheicum</i> Lange-Bertalot and Reichardt        | 5  |
| 98  | <i>Gomphonema pumilum</i> (Grunow) Reichardt et Lange-Bertalot       | 8  |
| 99  | <i>Gomphonema</i> sp. 1                                              | 8  |
|     | <i>Gomphonema</i> sp. 1                                              | 1  |
|     | <i>Gomphonema</i> sp. 1                                              | 5  |
|     | <i>Gomphonema</i> sp. 1                                              | 6  |
|     | <i>Gomphonema</i> sp. 1                                              | 7  |
| 100 | <i>Gomphonema</i> sp. 2                                              | 1  |
| 101 | <i>Gomphonema</i> sp. 3                                              | 5  |
| 102 | <i>Gomphonema</i> sp. 4                                              | 6  |
| 103 | <i>Gomphonema</i> sp. 5                                              | 7  |
| 104 | <i>Gomphonema</i> spp.                                               | 8  |
|     | <i>Gomphonema</i> spp.                                               | 1  |
| 105 | <i>Gyrosigma kuetzingii</i> (Grunow) Cleve                           | 5  |
| 106 | <i>Gyrosigma</i> sp. 1                                               | 10 |
| 107 | <i>Gyrosigma</i> sp. 2                                               | 10 |
| 108 | <i>Gyrosigma</i> sp. 3                                               | 10 |
| 109 | <i>Gyrosigma</i> sp. 4                                               | 10 |
| 110 | <i>Gyrosigma</i> sp. 5                                               | 10 |
| 111 | <i>Gyrosigma</i> sp. 6                                               | 10 |

Table S1. Cont.

|     |                                                                               |    |
|-----|-------------------------------------------------------------------------------|----|
| 112 | <i>Gyrosigma</i> sp. 7                                                        | 10 |
| 113 | <i>Gyrosigma</i> sp. 8                                                        | 10 |
| 114 | <i>Gyrosigma</i> sp. 9                                                        | 10 |
| 115 | <i>Gyrosigma</i> sp. 10                                                       | 10 |
| 116 | <i>Gyrosigma</i> sp. 11                                                       | 10 |
| 117 | <i>Halamphora salinicola</i> Levkov et D áz                                   | 10 |
| 118 | <i>Handmannia comta</i> (Ehrenberg) Kociolek & Khursevich                     | 10 |
| 119 | <i>Hippodonta capitata</i> (Ehrenberg) Lange-Bertalot, Metzeltin et Witkowski | 8  |
|     | <i>Hippodonta capitata</i> (Ehrenberg) Lange-Bertalot, Metzeltin et Witkowski | 1  |
|     | <i>Hippodonta capitata</i> (Ehrenberg) Lange-Bertalot, Metzeltin et Witkowski | 6  |
| 120 | <i>Hippodonta hungarica</i> (Grunow) Lange-Bertalot, Metzeltin et Witkowski   | 6  |
| 121 | <i>Karayevia clevei</i> (Grunow) Bukhtiyarova                                 | 5  |
| 122 | <i>Luticola mutica</i> (K ütz ing) Mann                                       | 5  |
|     | <i>Luticola mutica</i> (K ütz ing) Mann                                       | 5  |
| 123 | <i>Mayamaea permitis</i> (Hustedt) Bruder and Medlin                          | 1  |
| 124 | <i>Melosira varians</i> Agardh                                                | 6  |
| 125 | <i>Meridion circulare</i> var. <i>constrictum</i> (Ralfs) Van Heurck          | 5  |
|     | <i>Meridion circulare</i> var. <i>constrictum</i> (Ralfs) Van Heurck          | 7  |
| 126 | <i>Minidiscus</i> sp. 1                                                       | 10 |
| 127 | <i>Navicula angusta</i> Grunow                                                | 6  |
| 128 | <i>Navicula bicephala</i> Hustedt                                             | 8  |
|     | <i>Navicula bicephala</i> Hustedt                                             | 7  |
| 129 | <i>Navicula canalis</i> Patrick                                               | 1  |
| 130 | <i>Navicula cryptocephala</i> K ütz ing                                       | 1  |
|     | <i>Navicula cryptocephala</i> K ütz ing                                       | 2  |
|     | <i>Navicula cryptocephala</i> K ütz ing                                       | 5  |
|     | <i>Navicula cryptocephala</i> K ütz ing                                       | 6  |
|     | <i>Navicula cryptocephala</i> K ütz ing                                       | 7  |
|     | <i>Navicula cryptocephala</i> K ütz ing                                       | 8  |
|     | <i>Navicula cryptocephala</i> K ütz ing                                       | 9  |
| 131 | <i>Navicula cryptotenella</i> Lange-Bertalot                                  | 1  |
|     | <i>Navicula cryptotenella</i> Lange-Bertalot                                  | 4  |
|     | <i>Navicula cryptotenella</i> Lange-Bertalot                                  | 5  |
| 132 | <i>Navicula difficillima</i> Hustedt                                          | 5  |
|     | <i>Navicula difficillima</i> Hustedt                                          | 8  |
| 133 | <i>Navicula erifuga</i> Lange-Bertalot                                        | 6  |
|     | <i>Navicula erifuga</i> Lange-Bertalot                                        | 10 |
| 134 | <i>Navicula gregaria</i> Donkin                                               | 9  |
| 135 | <i>Navicula halinae</i> Witkowski                                             | 10 |
| 136 | <i>Navicula indifferens</i> Hustedt                                           | 1  |
| 137 | <i>Navicula ingenua</i> Hustedt                                               | 1  |
| 138 | <i>Navicula notha</i> Wallace                                                 | 1  |
| 139 | <i>Navicula pavillardi</i> Hustedt                                            | 10 |
| 140 | <i>Navicula recens</i> (Lange-Bertalot) Lange-Bertalot                        | 2  |
|     | <i>Navicula recens</i> (Lange-Bertalot) Lange-Bertalot                        | 10 |
| 141 | <i>Navicula reichardtiana</i> Lange-Bertalot                                  | 4  |

Table S1. Cont.

|     |                                              |    |
|-----|----------------------------------------------|----|
| 142 | <i>Navicula salinicola</i> Hustedt           | 10 |
| 143 | <i>Navicula schadei</i> Krasske              | 5  |
|     | <i>Navicula schadei</i> Krasske              | 8  |
| 144 | <i>Navicula</i> sp. 1                        | 2  |
| 145 | <i>Navicula</i> sp. 2                        | 8  |
| 146 | <i>Navicula</i> sp. 3                        | 7  |
| 147 | <i>Navicula</i> sp. 4                        | 10 |
| 148 | <i>Navicula</i> sp. 5                        | 6  |
| 149 | <i>Navicula</i> sp. 6                        | 9  |
| 150 | <i>Navicula</i> sp. 7                        | 2  |
| 151 | <i>Navicula</i> sp. 8                        | 6  |
|     | <i>Navicula</i> sp. 8                        | 9  |
|     | <i>Navicula</i> sp. 8                        | 10 |
| 152 | <i>Navicula</i> sp. 9                        | 6  |
| 153 | <i>Navicula</i> sp. 10                       | 6  |
| 154 | <i>Navicula</i> sp. 11                       | 6  |
| 155 | <i>Navicula</i> sp. 12                       | 6  |
| 156 | <i>Navicula</i> sp. 13                       | 6  |
| 157 | <i>Navicula</i> sp. 14                       | 6  |
| 158 | <i>Navicula</i> sp. 15                       | 6  |
| 159 | <i>Navicula</i> sp. 16                       | 6  |
| 160 | <i>Navicula</i> sp. 17                       | 6  |
| 161 | <i>Navicula</i> sp. 18                       | 6  |
| 162 | <i>Navicula</i> sp. 19                       | 6  |
| 163 | <i>Navicula subminuscula</i> Manguin         | 2  |
| 164 | <i>Navicula tenelloides</i> Hustedt          | 8  |
| 165 | <i>Navicula tripunctata</i> (Müller) Bory    | 5  |
| 166 | <i>Navicula trivialis</i> Lange-Bertalot     | 1  |
| 167 | <i>Navicula veneta</i> Kützing               | 1  |
|     | <i>Navicula veneta</i> Kützing               | 4  |
| 168 | <i>Navicula viridula</i> (Kützing) Kützing   | 5  |
| 169 | <i>Neidium ampliatum</i> (Ehrenberg) Krammer | 8  |
| 170 | <i>Neidium dubium</i> (Ehrenberg) Cleve      | 5  |
| 171 | <i>Neidium</i> sp. 1                         | 5  |
| 172 | <i>Nitzschia acicularis</i> (Kützing) Smith  | 2  |
|     | <i>Nitzschia acicularis</i> (Kützing) Smith  | 5  |
| 173 | <i>Nitzschia agnita</i> Hustedt              | 4  |
|     | <i>Nitzschia agnita</i> Hustedt              | 10 |
| 174 | <i>Nitzschia amphibia</i> Grunow             | 6  |
|     | <i>Nitzschia amphibia</i> Grunow             | 2  |
|     | <i>Nitzschia amphibia</i> Grunow             | 5  |
| 175 | <i>Nitzschia amphibioides</i> Hustedt        | 3  |
| 176 | <i>Nitzschia angustata</i> (Smith) Grunow    | 2  |
| 177 | <i>Nitzschia archibaldii</i> Lange-Bertalot  | 2  |
| 178 | <i>Nitzschia compressa</i> (Bailey) Boyer    | 6  |
| 179 | <i>Nitzschia desertorum</i> Hustedt          | 2  |

Table S1. Cont.

|     |                                                             |    |
|-----|-------------------------------------------------------------|----|
| 180 | <i>Nitzschia dissipata</i> (Kützing) Grunow                 | 10 |
| 181 | <i>Nitzschia dubia</i> Smith                                | 6  |
| 182 | <i>Nitzschia filiformis</i> (Smith) Van Heurck              | 1  |
| 183 | <i>Nitzschia fonticola</i> (Grunow) Grunow                  | 9  |
|     | <i>Nitzschia fonticola</i> (Grunow) Grunow                  | 1  |
| 184 | <i>Nitzschia fossilis</i> (Grunow) Grunow                   | 1  |
| 185 | <i>Nitzschia frustulum</i> (Kützing) Grunow                 | 2  |
|     | <i>Nitzschia frustulum</i> (Kützing) Grunow                 | 7  |
| 186 | <i>Nitzschia gracilis</i> Hantzsch                          | 1  |
| 187 | <i>Nitzschia granulata</i> Grunow                           | 10 |
| 188 | <i>Nitzschia inconspicua</i> Grunow                         | 1  |
|     | <i>Nitzschia inconspicua</i> Grunow                         | 4  |
| 189 | <i>Nitzschia lacuum</i> Lange-Bertalot                      | 6  |
| 190 | <i>Nitzschia laevis</i> Hustedt                             | 10 |
| 191 | <i>Nitzschia lanceola</i> Grunow                            | 10 |
| 192 | <i>Nitzschia lanceolata</i> Smith                           | 10 |
| 193 | <i>Nitzschia liebethruthii</i> Rabenhorst                   | 2  |
|     | <i>Nitzschia liebethruthii</i> Rabenhorst                   | 4  |
| 194 | <i>Nitzschia lorenziana</i> Grunow                          | 10 |
| 195 | <i>Nitzschia microcephala</i> Grunow                        | 1  |
| 196 | <i>Nitzschia nana</i> Grunow ex Van Heurck                  | 2  |
| 197 | <i>Nitzschia palea</i> (Kützing) Smith                      | 1  |
|     | <i>Nitzschia palea</i> (Kützing) Smith                      | 4  |
|     | <i>Nitzschia palea</i> (Kützing) Smith                      | 8  |
| 198 | <i>Nitzschia palea</i> var. <i>debilis</i> (Kützing) Grunow | 2  |
|     | <i>Nitzschia palea</i> var. <i>debilis</i> (Kützing) Grunow | 4  |
|     | <i>Nitzschia palea</i> var. <i>debilis</i> (Kützing) Grunow | 5  |
|     | <i>Nitzschia palea</i> var. <i>debilis</i> (Kützing) Grunow | 6  |
|     | <i>Nitzschia palea</i> var. <i>debilis</i> (Kützing) Grunow | 7  |
|     | <i>Nitzschia palea</i> var. <i>debilis</i> (Kützing) Grunow | 8  |
| 199 | <i>Nitzschia palea</i> var. <i>tenuirostris</i> Grunow      | 8  |
| 200 | <i>Nitzschia paleacea</i> Grunow                            | 1  |
| 201 | <i>Nitzschia paleaeformis</i> Hustedt                       | 5  |
| 203 | <i>Nitzschia sigma</i> (Kützing) Smith                      | 10 |
| 204 | <i>Nitzschia</i> sp. 1                                      | 6  |
|     | <i>Nitzschia</i> sp. 1                                      | 8  |
| 205 | <i>Nitzschia</i> sp. 2                                      | 1  |
| 206 | <i>Nitzschia</i> sp. 3                                      | 6  |
| 207 | <i>Nitzschia</i> sp. 4                                      | 4  |
| 208 | <i>Nitzschia</i> sp. 5                                      | 8  |
| 209 | <i>Nitzschia</i> sp. 6                                      | 5  |
| 210 | <i>Nitzschia</i> sp. 9                                      | 9  |
| 211 | <i>Nitzschia</i> sp. 10                                     | 5  |
| 212 | <i>Nitzschia</i> sp. 11                                     | 8  |
| 213 | <i>Nitzschia</i> sp. 12                                     | 10 |
| 214 | <i>Nitzschia</i> sp. 13                                     | 2  |

Table S1. Cont.

|     |                                                                     |    |
|-----|---------------------------------------------------------------------|----|
| 215 | <i>Nitzschia</i> sp. 14                                             | 6  |
| 216 | <i>Nitzschia</i> spp.                                               | 2  |
| 217 | <i>Nitzschia subacicularis</i> Hustedt                              | 4  |
| 218 | <i>Nupela</i> sp. 5                                                 | 8  |
| 219 | <i>Paralia sulcata</i> (Ehrenberg) Cleve                            | 10 |
| 220 | <i>Pinnularia borealis</i> var. <i>rectangularis</i> Carlson        | 8  |
| 221 | <i>Pinnularia gibba</i> (Ehrenberg) Ehrenberg                       | 2  |
| 222 | <i>Pinnularia legumen</i> Ehrenberg                                 | 8  |
|     | <i>Pinnularia legumen</i> Ehrenberg                                 | 5  |
| 223 | <i>Pinnularia obscura</i> Krasske                                   | 8  |
|     | <i>Pinnularia obscura</i> Krasske                                   | 5  |
| 224 | <i>Pinnularia schroederii</i> (Hustedt) Krammer                     | 5  |
| 225 | <i>Pinnularia</i> sp. 1                                             | 2  |
|     | <i>Pinnularia</i> sp. 1                                             | 10 |
| 226 | <i>Pinnularia</i> sp. 2                                             | 9  |
| 227 | <i>Pinnularia</i> sp. 3                                             | 5  |
| 228 | <i>Pinnularia</i> sp. 4                                             | 8  |
| 229 | <i>Pinnularia</i> sp. 5                                             | 10 |
| 230 | <i>Pinnularia</i> sp. 6                                             | 2  |
| 231 | <i>Pinnularia</i> sp. 7                                             | 6  |
| 232 | <i>Pinnularia</i> spp                                               | 6  |
| 233 | <i>Pinnularia subcapitata</i> Gregory                               | 1  |
|     | <i>Pinnularia subcapitata</i> Gregory                               | 5  |
|     | <i>Pinnularia subcapitata</i> Gregory                               | 7  |
| 234 | <i>Pinnularia viridiformis</i> var. <i>minor</i> Krammer            | 5  |
| 235 | <i>Pinnularia viridis</i> (Nitzsch) Ehrenberg                       | 5  |
| 236 | <i>Placoneis symmetrica</i> (Hustedt) Lange-Bertalot                | 5  |
| 237 | <i>Planothidium delicatulum</i> (Kützing) Round et Bukhtiyarova     | 6  |
| 238 | <i>Planothidium dubium</i> (Grunow) Round et Bukhtiyarova           | 9  |
|     | <i>Planothidium dubium</i> (Grunow) Round et Bukhtiyarova           | 1  |
| 239 | <i>Planothidium frequentissimum</i> (Lange-Bertalot) Lange-Bertalot | 6  |
|     | <i>Planothidium frequentissimum</i> (Lange-Bertalot) Lange-Bertalot | 2  |
|     | <i>Planothidium frequentissimum</i> (Lange-Bertalot) Lange-Bertalot | 5  |
| 240 | <i>Planothidium lanceolatum</i> (Brøgger ex Kützing) Lange-Bertalot | 2  |
|     | <i>Planothidium lanceolatum</i> (Brøgger ex Kützing) Lange-Bertalot | 4  |
|     | <i>Planothidium lanceolatum</i> (Brøgger ex Kützing) Lange-Bertalot | 7  |
| 241 | <i>Planothidium rostratum</i> (Østrup) Lange-Bertalot               | 8  |
|     | <i>Planothidium rostratum</i> (Østrup) Lange-Bertalot               | 5  |
|     | <i>Planothidium rostratum</i> (Østrup) Lange-Bertalot               | 7  |
| 242 | <i>Pleurosigma angulatum</i> (Quekett) Smith                        | 5  |
| 243 | <i>Pleurosigma</i> sp. 1                                            | 10 |
| 244 | <i>Pleurosigma</i> sp. 2                                            | 10 |
| 245 | <i>Pleurosigma</i> sp. 3                                            | 10 |
| 246 | <i>Pleurosigma</i> sp. 4                                            | 10 |
| 247 | <i>Pleurosigma</i> sp. 5                                            | 10 |
| 248 | <i>Psammothidium ventralis</i> (Krasske) Bukhtiyarova and Round     | 7  |



Table S1. Cont.

|     |                                                                        |    |
|-----|------------------------------------------------------------------------|----|
| 249 | <i>Rhaphoneis amphiceros</i> (Ehrenberg) Ehrenberg                     | 10 |
| 250 | <i>Rhaphoneis grossepunctata</i> Hustedt                               | 10 |
| 251 | <i>Rhizosolenia</i> sp. 1                                              | 10 |
| 252 | <i>Rhoicosphenia abbreviata</i> (Agardh) Lange-Bertalot                | 1  |
|     | <i>Rhoicosphenia abbreviata</i> (Agardh) Lange-Bertalot                | 4  |
| 253 | <i>Sellaphora laevissima</i> (Kützing) Mann                            | 5  |
| 254 | <i>Sellaphora parapupula</i> Lange-Bertalot                            | 5  |
| 255 | <i>Sellaphora pupula</i> (Kützing) Mereschkowsky                       | 8  |
|     | <i>Sellaphora pupula</i> (Kützing) Mereschkowsky                       | 5  |
|     | <i>Sellaphora pupula</i> (Kützing) Mereschkowsky                       | 6  |
|     | <i>Sellaphora pupula</i> (Kützing) Mereschkowsky                       | 7  |
|     | <i>Sellaphora pupula</i> (Kützing) Mereschkowsky                       | 9  |
| 256 | <i>Sellaphora rectangularis</i> (Gregory) Lange-Bertalot and Metzeltin | 7  |
| 257 | <i>Sellaphora seminulum</i> (Grunow) Mann                              | 1  |
| 258 | <i>Skeletonema costatum</i> (Greville) Cleve                           | 10 |
| 259 | <i>Stauroneis anceps</i> Ehrenberg                                     | 5  |
| 260 | <i>Stauroneis gracilior</i> Reichardt                                  | 5  |
| 261 | <i>Stauroneis nobilis</i> Schumann                                     | 5  |
| 262 | <i>Stauroneis phoenicenteron</i> (Nitzsch) Ehrenberg                   | 5  |
| 263 | <i>Stauroneis smithii</i> var. <i>incisa</i> Pantocsek                 | 7  |
| 264 | <i>Staurosira construens</i> Ehrenberg                                 | 8  |
|     | <i>Staurosira construens</i> Ehrenberg                                 | 5  |
|     | <i>Staurosira construens</i> Ehrenberg                                 | 7  |
| 265 | <i>Staurosira construens</i> var. <i>venter</i> (Ehrenberg) Hamilton   | 1  |
| 266 | <i>Staurosira</i> sp. 1                                                | 9  |
| 267 | <i>Staurosira</i> sp. 2                                                | 5  |
| 268 | <i>Staurosira</i> sp. 3                                                | 8  |
| 269 | <i>Staurosira</i> sp. 4                                                | 10 |
| 270 | <i>Staurosira</i> sp. 5                                                | 2  |
| 271 | <i>Staurosira</i> sp. 6                                                | 6  |
| 272 | <i>Staurosirella pinnata</i> (Ehrenberg) Williams et Round             | 8  |
|     | <i>Staurosirella pinnata</i> (Ehrenberg) Williams et Round             | 5  |
|     | <i>Staurosirella pinnata</i> (Ehrenberg) Williams et Round             | 7  |
|     | <i>Staurosirella pinnata</i> (Ehrenberg) Williams et Round             | 9  |
|     | <i>Staurosirella pinnata</i> (Ehrenberg) Williams et Round             | 10 |
| 273 | <i>Surirella angusta</i> Kützing                                       | 1  |
|     | <i>Surirella angusta</i> Kützing                                       | 5  |
|     | <i>Surirella angusta</i> Kützing                                       | 9  |
| 274 | <i>Surirella</i> sp. 1                                                 | 5  |
|     | <i>Surirella</i> sp. 1                                                 | 7  |
| 275 | <i>Surirella</i> sp. 2                                                 | 9  |
| 276 | <i>Surirella</i> sp. 3                                                 | 5  |
| 277 | <i>Surirella</i> sp. 4                                                 | 8  |
| 278 | <i>Surirella</i> sp. 5                                                 | 9  |
| 279 | <i>Surirella</i> sp. 6                                                 | 2  |
| 280 | <i>Surirella</i> sp. 7                                                 | 6  |

Table S1. Cont.

|     |                                                                       |    |
|-----|-----------------------------------------------------------------------|----|
| 281 | <i>Surirella</i> sp. 8                                                | 5  |
| 282 | <i>Surirella</i> sp. 9                                                | 10 |
| 283 | <i>Synedra</i> sp. 1                                                  | 5  |
| 284 | <i>Synedra</i> sp. 2                                                  | 2  |
|     | <i>Synedra</i> sp. 2                                                  | 8  |
|     | <i>Synedra</i> sp. 2                                                  | 9  |
| 285 | <i>Synedra</i> sp. 3                                                  | 5  |
|     | <i>Synedra</i> sp. 3                                                  | 6  |
|     | <i>Synedra</i> sp. 3                                                  | 10 |
| 286 | <i>Tabellaria flocculosa</i> (Roth) Kützing                           | 9  |
| 287 | <i>Terpsino ëmusica</i> Ehrenberg                                     | 10 |
| 288 | <i>Thalassionema pseudonitzschioides</i> (Schuette et Schrader) Hasle | 10 |
| 289 | <i>Thalassionema</i> sp. 6                                            | 10 |
| 290 | <i>Thalassiosira pseudonana</i> Hasle et Heimdal                      | 1  |
| 291 | <i>Thalassiosira</i> sp. 1                                            | 10 |
| 292 | <i>Thalassiosira</i> sp. 2                                            | 8  |
|     | <i>Thalassiosira</i> sp. 2                                            | 10 |
| 293 | <i>Thalassiosira</i> sp. 3                                            | 10 |
| 294 | <i>Thalassiosira</i> sp. 4                                            | 2  |
| 295 | <i>Thalassiosira</i> sp. 5                                            | 6  |
| 296 | <i>Thalassiosira</i> sp. 6                                            | 5  |
|     | <i>Thalassiosira</i> sp. 6                                            | 9  |
| 297 | <i>Thalassiosira weissflogii</i> (Grunow) Fryxell et Hasle            | 2  |
| 298 | <i>Tryblionella apiculata</i> Gregory                                 | 6  |
| 299 | <i>Tryblionella levidensis</i> Smith                                  | 8  |
| 300 | <i>Tryblionella</i> sp. 1                                             | 10 |
| 301 | <i>Tryblionella</i> sp. 2                                             | 6  |
| 302 | <i>Tryblionella</i> sp. 3                                             | 2  |
| 303 | <i>Tryblionella</i> sp. 4                                             | 8  |
| 304 | <i>Tryblionella</i> sp. 5                                             | 7  |
| 305 | <i>Tryblionella</i> sp. 6                                             | 2  |
| 306 | <i>Tryblionella</i> sp. 7                                             | 2  |
| 307 | <i>Tryblionella</i> sp. 8                                             | 10 |
| 308 | <i>Tryblionella</i> sp. 9                                             | 10 |
| 309 | <i>Tryblionella</i> sp. 10                                            | 10 |
| 310 | <i>Tryblionella</i> sp. 11                                            | 10 |
| 311 | <i>Tryblionella</i> sp. 12                                            | 10 |
| 312 | <i>Tryblionella</i> sp. 13                                            | 10 |
| 313 | <i>Tryblionella</i> sp. 14                                            | 10 |
| 314 | <i>Tryblionella</i> sp. 15                                            | 10 |
| 315 | <i>Tryblionella</i> sp. 16                                            | 10 |
| 316 | <i>Tryblionella</i> sp. 17                                            | 10 |
| 317 | <i>Tryblionella</i> sp. 18                                            | 10 |
| 318 | <i>Tryblionella</i> sp. 19                                            | 10 |
| 319 | <i>Tryblionella</i> sp. 20                                            | 10 |
| 320 | <i>Tryblionella</i> sp. 21                                            | 10 |

**Table S1. Cont.**

|     |                                                                      |    |
|-----|----------------------------------------------------------------------|----|
| 321 | <i>Tryblionella</i> sp. 22                                           | 10 |
| 322 | <i>Tryblionella</i> sp. 23                                           | 10 |
| 323 | <i>Tryblionella</i> sp. 24                                           | 10 |
| 324 | <i>Tryblionella</i> sp. 25                                           | 10 |
| 325 | <i>Tryblionella</i> sp. 26                                           | 10 |
| 326 | <i>Tryblionella</i> sp. 27                                           | 10 |
| 327 | <i>Tryblionella</i> sp. 28                                           | 10 |
| 328 | <i>Tryblionella</i> sp. 29                                           | 10 |
| 329 | <i>Ulnaria acus</i> (Kützing) Aboal                                  | 5  |
| 330 | <i>Ulnaria delicatissima</i> (W. Smith) Aboal et Silva               | 8  |
| 331 | <i>Ulnaria delicatissima</i> var. <i>angustissima</i> (Grunow) Aboal | 7  |
| 332 | <i>Ulnaria ulna</i> (Nitzsch) Compère                                | 10 |
| 333 | Undetermined Centric sp. 1                                           | 7  |
| 334 | Undetermined Pennate                                                 | 10 |
| 335 | Undetermined Pennate sp. 1                                           | 5  |
|     | Undetermined Pennate sp. 1                                           | 8  |
| 336 | Undetermined Pennate sp. 2                                           | 5  |

**Supplementary Data S2**

Measurement of oil droplets: Diatoms used in Figure 3 were collected in Georgia (USA) (see Table 1). All observations were performed with a 40× objective lens and 10× eyepiece on a Lumar scope or Leica DM2500 microscope equipped with differential interference contrast (DIC). Under 400× magnification most diatoms were identified to genus. Images were captured and specimens were measured using a 3 megapixel Leica DFC295 color digital camera. The following morphological characters were recorded: length of apical axis; maximal length of transapical axis at widest part, chloroplast shape and number. Biovolume was calculated by approximating the shape of the diatoms to a geometric shape [1]. Oil droplets were approximated to spheres and the total volume of the spheres was calculated by measuring the diameter of each visible oil droplet and multiplying the number of spheres of respective size added together. The fine focus was traversed up and down to ensure observation of all visible oil droplets within the cells and the maximum diameter of each oil droplet in a through focal scan was obtained. Diatoms were classified in 5 categories based on biovolume: (1) representatives of *Cymatoseira*, *Eunotia*, *Achnantheidium* and *Cyclotella* 10–500  $\mu\text{m}^3$ ; (2) *Fragilaria*, some *Navicula* and *Nitzschia* species 501–1000  $\mu\text{m}^3$ ; (3) *Craticula*, 1001–1500  $\mu\text{m}^3$ ; (4) Representatives of *Synedra*, *Nitzschia*, *Gomphoneis*, *Gyrosigma*, *Pleurosigma*, large *Navicula* species: 1501–4000  $\mu\text{m}^3$ ; (5) *Pleurosira*, *Synedra* and *Terpsinoë* >5000  $\mu\text{m}^3$ . Categories are based on the fact that most diatoms from these environments in Southeastern Georgia have a biovolume less than 3000  $\mu\text{m}^3$ . Our approach of classifying cell biovolume of the very diverse diatom community into only 5 categories accounted for the averages of total oil droplet volume within category #1 appearing to be larger than the average cell biovolume. This is an artifact of the 50-fold range of diatom volumes in category #1.

Accumulation of lipid as oil droplets has been reported as visible under light microscopy (reviewed in: [2–4]). Thus, for this project, only presence/absence and size of obvious, refractile oil droplets were

documented, comparable to those portrayed elsewhere [4–6]. Oil droplets could have been slightly overestimated in size due to diffraction effects. Only opaque, refractile, colored spheres within the cells were considered to be oil droplets, but it is possible that some granules or other cellular material were included, and that nonspherical oil droplets were excluded. Although it was suggested that “...Stoermer & Pankratz [7] report extremely large oil bodies, occupying the entire vacuole in *Amphipleura pellucida*...” [3] (cf. Figure 3 in [8]), there is no discussion of such in that paper [7] or its sequel, in which it is stated instead: “Large vacuoles fill most of the portions of the cell distal to the central cytoplasmic bridge. These are crossed by cytoplasmic strands which often contain oil bodies of varying sizes” [9].

We did not attempt to locate the oil droplets we observed relative to the vacuoles. (Diatoms have one or two vacuoles, which are clear [10], sometimes many [11].) Oil droplets can occur inside [9,12] or outside vacuoles [10,11,13]. Of course, we could not see the initial, visually submicroscopic oil droplets that form near [14] or within [15] the pyrenoids, as shown by electron microscopy. Thus visual microscopy may alternatively underestimate the total oil present. For future work, vital lipid stains [16], vital fluorescent dyes [6,17,18] for lipids, or noninvasive color/spectral difference image processing [19,20] might be useful for quantitating how much oil can be milked and the production and recovery of production of oil in single diatoms.

## References

1. Hillebrand, H.; Durselen, C.D.; Kirschtel, D.; Pollinger, U.; Zohary, T. Biovolume calculation for pelagic and benthic microalgae. *J. Phycol.* **1999**, *35*, 403–424.
2. Smith, G.M. *The Fresh-Water Algae of the United States*, 2nd ed.; McGraw-Hill Book Co.: New York, NY, USA, 1950.
3. Duke, E.L.; Reimann, B.E.F. The ultrastructure of the diatom cell. In *The Biology of Diatoms*; Werner, D., Ed.; Blackwell Scientific Publications: Oxford, UK, 1977; pp. 65–109.
4. Lauritis, J.A.; Coombs, J.; Volcani, B.E. Studies on the biochemistry and fine structure of silica shell formation in diatoms IV. Fine structure of the apochlorotic diatom *Nitzschia alba* Lewin and Lewin. *Arch. Mikrobiol.* **1968**, *62*, 1–16.
5. Ramachandra, T.V.; Mahapatra, D.M.; Karthick B.; Gordon, R. Milking diatoms for sustainable energy: biochemical engineering versus gasoline-secreting diatom solar panels. *Ind. Eng. Chem. Res.* **2009**, *48*, 8769–8788.
6. Hildebrand, M.; Davis, A.K.; Smith, S.R.; Traller, J.C.; Abbriano, R. The place of diatoms in the biofuels industry. *Biofuels* **2012**, *3*, 221–240.
7. Stoermer, E.F.; Pankratz, H.S. Fine structure of diatom *Amphipleura pellucida*. I. Wall structure. *Am. J. Bot.* **1964**, *51*, 986–990.
8. Drum, R.W.; Pankratz, H.S. Post mitotic fine structure of *Gomphonema parvulum*. *J. Ultrastruct. Res.* **1964**, *10*, 217–223.
9. Stoermer, E.F.; Pankratz, H.S.; Bowen, C.C. Fine structure of the diatom *Amphipleura pellucida*. II. Cytoplasmic fine structure and frustule formation. *Am. J. Bot.* **1965**, *52*, 1067–1078.
10. Round, F.E.; Crawford, R.M.; Mann, D.G. *The Diatoms, Biology & Morphology of the Genera*; Cambridge University Press: Cambridge, UK, 1990.

11. Anderson, O.R. The ultrastructure and cytochemistry of resting cell formation in *Amphora coffaeiformis* (Bacillariophyceae). *J. Phycol.* **1975**, *11*, 272–281.
12. Yang, S.; Wu, R.S.S.; Kong, R.Y.C. Physiological and cytological responses of the marine diatom *Skeletonema costatum* to 2,4-dichlorophenol. *Aquat. Toxicol.* **2002**, *60*, 33–41.
13. Crawford, R.M. The protoplasmic ultrastructure of the vegetative cell of *Melosira varians* C.A. Agardh. *J. Phycol.* **1973**, *9*, 50–61.
14. Drum, R.W.; Pankratz, H.S. Pyrenoids, raphes and other fine structure in diatoms. *Am. J. Bot.* **1964**, *51*, 405–418.
15. Stoermer, E.F.; Pankratz, H.S.; Drum, R.W. The fine structure of *Mastogloia grevillei* Wm. Smith. *Protoplasma* **1964**, *59*, 1–13.
16. Enghusen, E.; Enghusen, K. Einige Untersuchungen über Vitalfärbung und Vitalfarbstoffe. *Acta Anat.* **1961**, *45*, 177–201.
17. Cooper, M.S.; Hardin, W.R.; Petersen, T.W.; Cattolico, R.A. Visualizing "green oil" in live algal cells. *J. Biosci. Bioeng.* **2010**, *109*, 198–201.
18. Govender, T.; Ramanna, L.; Rawat, I.; Bux, F. BODIPY staining, an alternative to the Nile Red fluorescence method for the evaluation of intracellular lipids in microalgae. *Bioresour. Technol.* **2012**, *114*, 507–511.
19. Weeks, A.R., Jr. *Fundamentals of Electronic Image Processing*; SPIE Optical Engineering Press: Bellingham, WA, USA, 1996.
20. Holmes, T.; Larson, J.; Turturro, M.; Vaicik, M.; Papavasiliou, G.; Larkin, S.; Holmes, C.D.; Jurkevich, A.; Sinha, S.; Toshihiko, E.; *et al.* Multimodality, multispectral and 3D light microscopy of engineered tissues without dyes. *J. Tissue Eng. Regen. Med.* **2012**, *6*, 335.

© 2015 by the authors; licensee MDPI, Basel, Switzerland. This article is an open access article distributed under the terms and conditions of the Creative Commons Attribution license (<http://creativecommons.org/licenses/by/4.0/>).
